# Supplementary material
Source: publisher site journal article supplement (https://www.dovepress.com/article/600578)
Supplement: Supplementary file 1 [file 600578%20Supplementary%20Figures%201-4.docx]

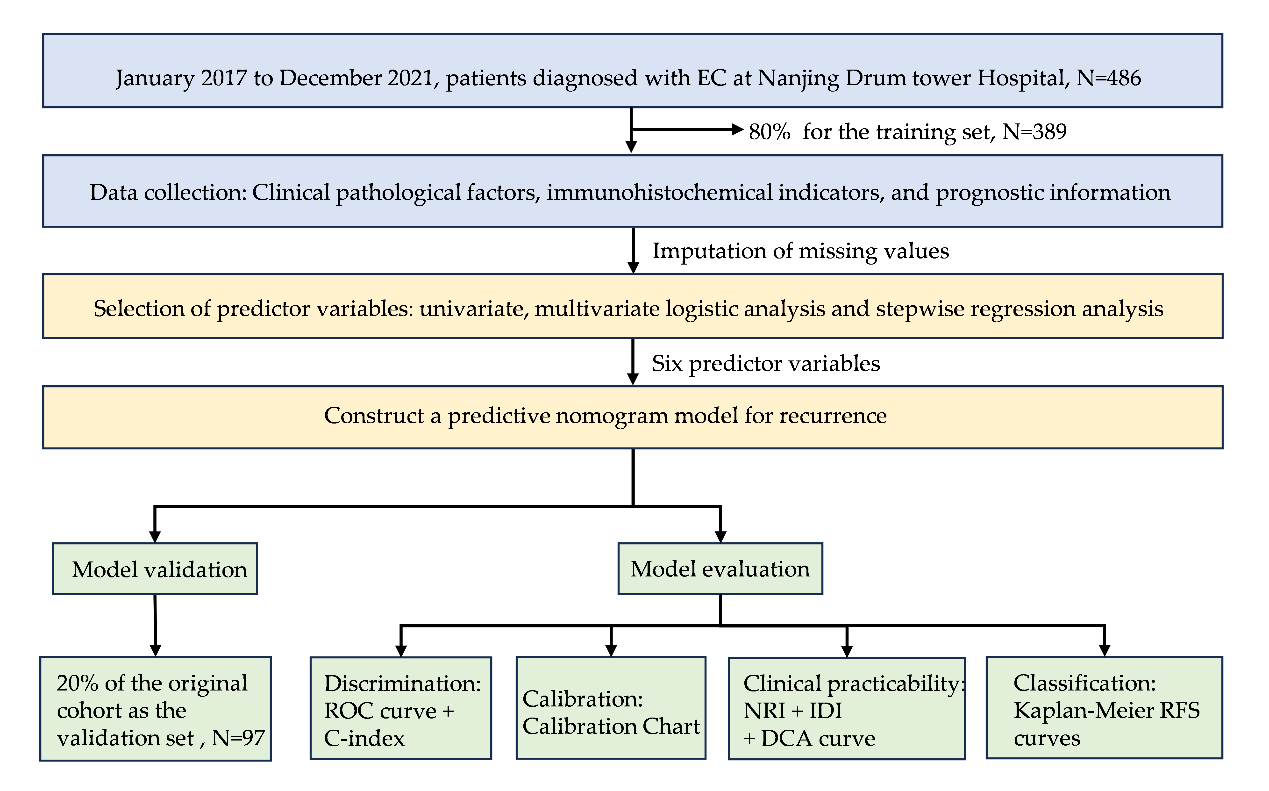


**Supplementary Figure 1.** Flowchart of study.


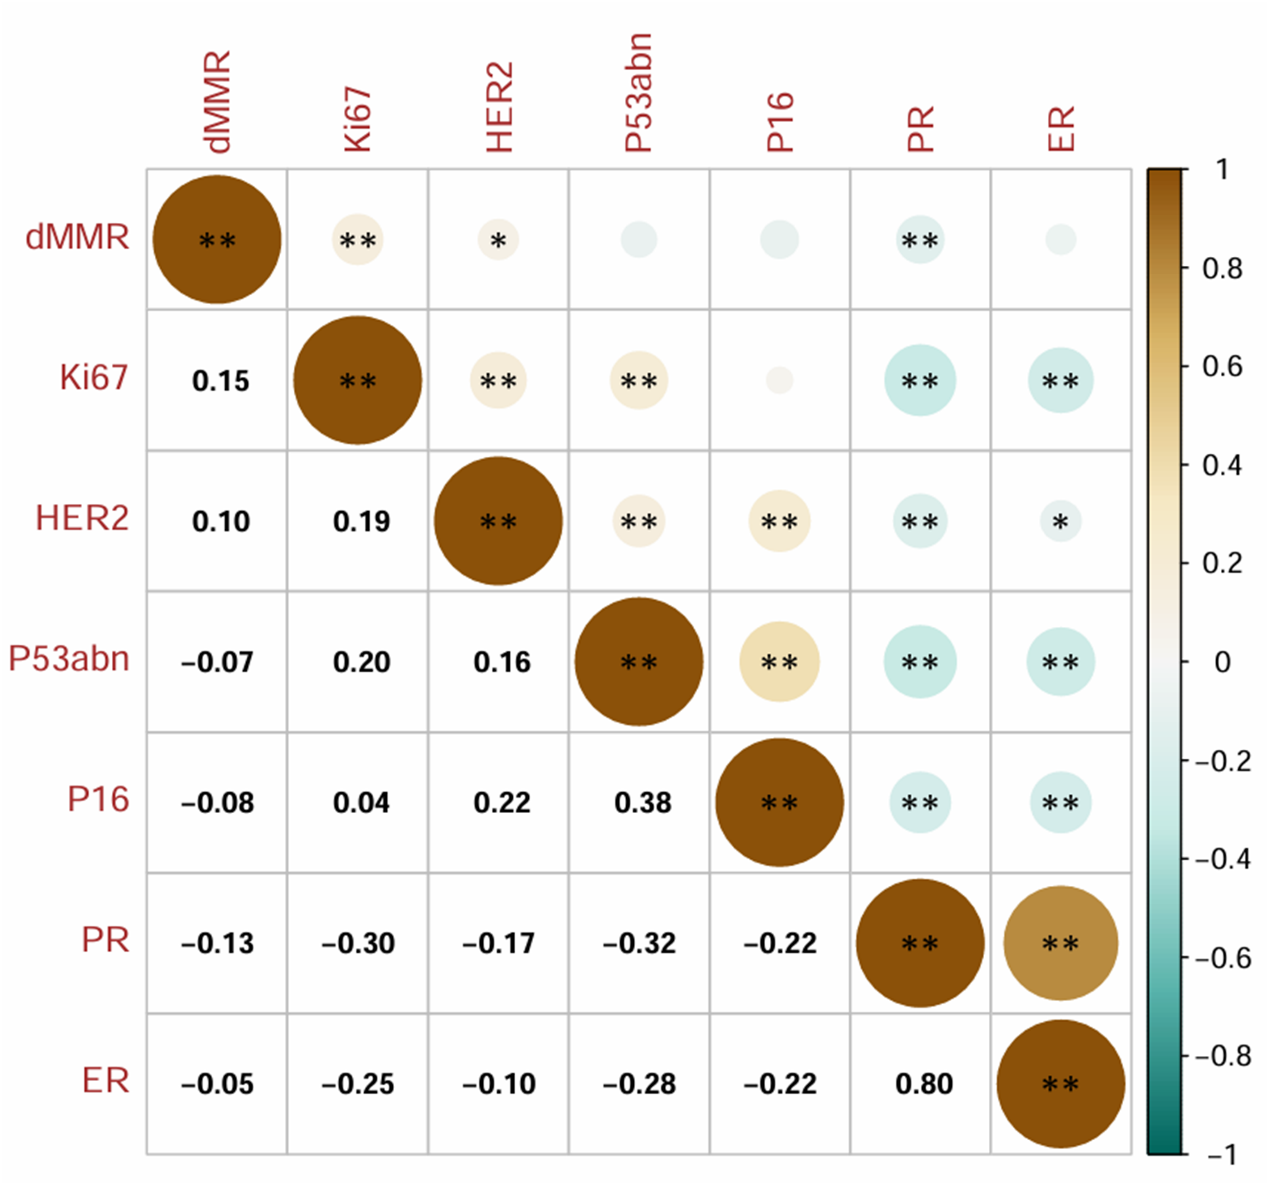


**Supplementary Figure 2.** Correlation between P16, P53, HER2, Ki67, dMMR, ER and PR in endometrial cancer. *p<0.05, and **p<0.01. ER, estrogen receptor; PR, progesterone receptor; P53abn, P53 abnormal; HER2, human epidermal growth factor receptor 2; dMMR, mismatch repair deficiency.


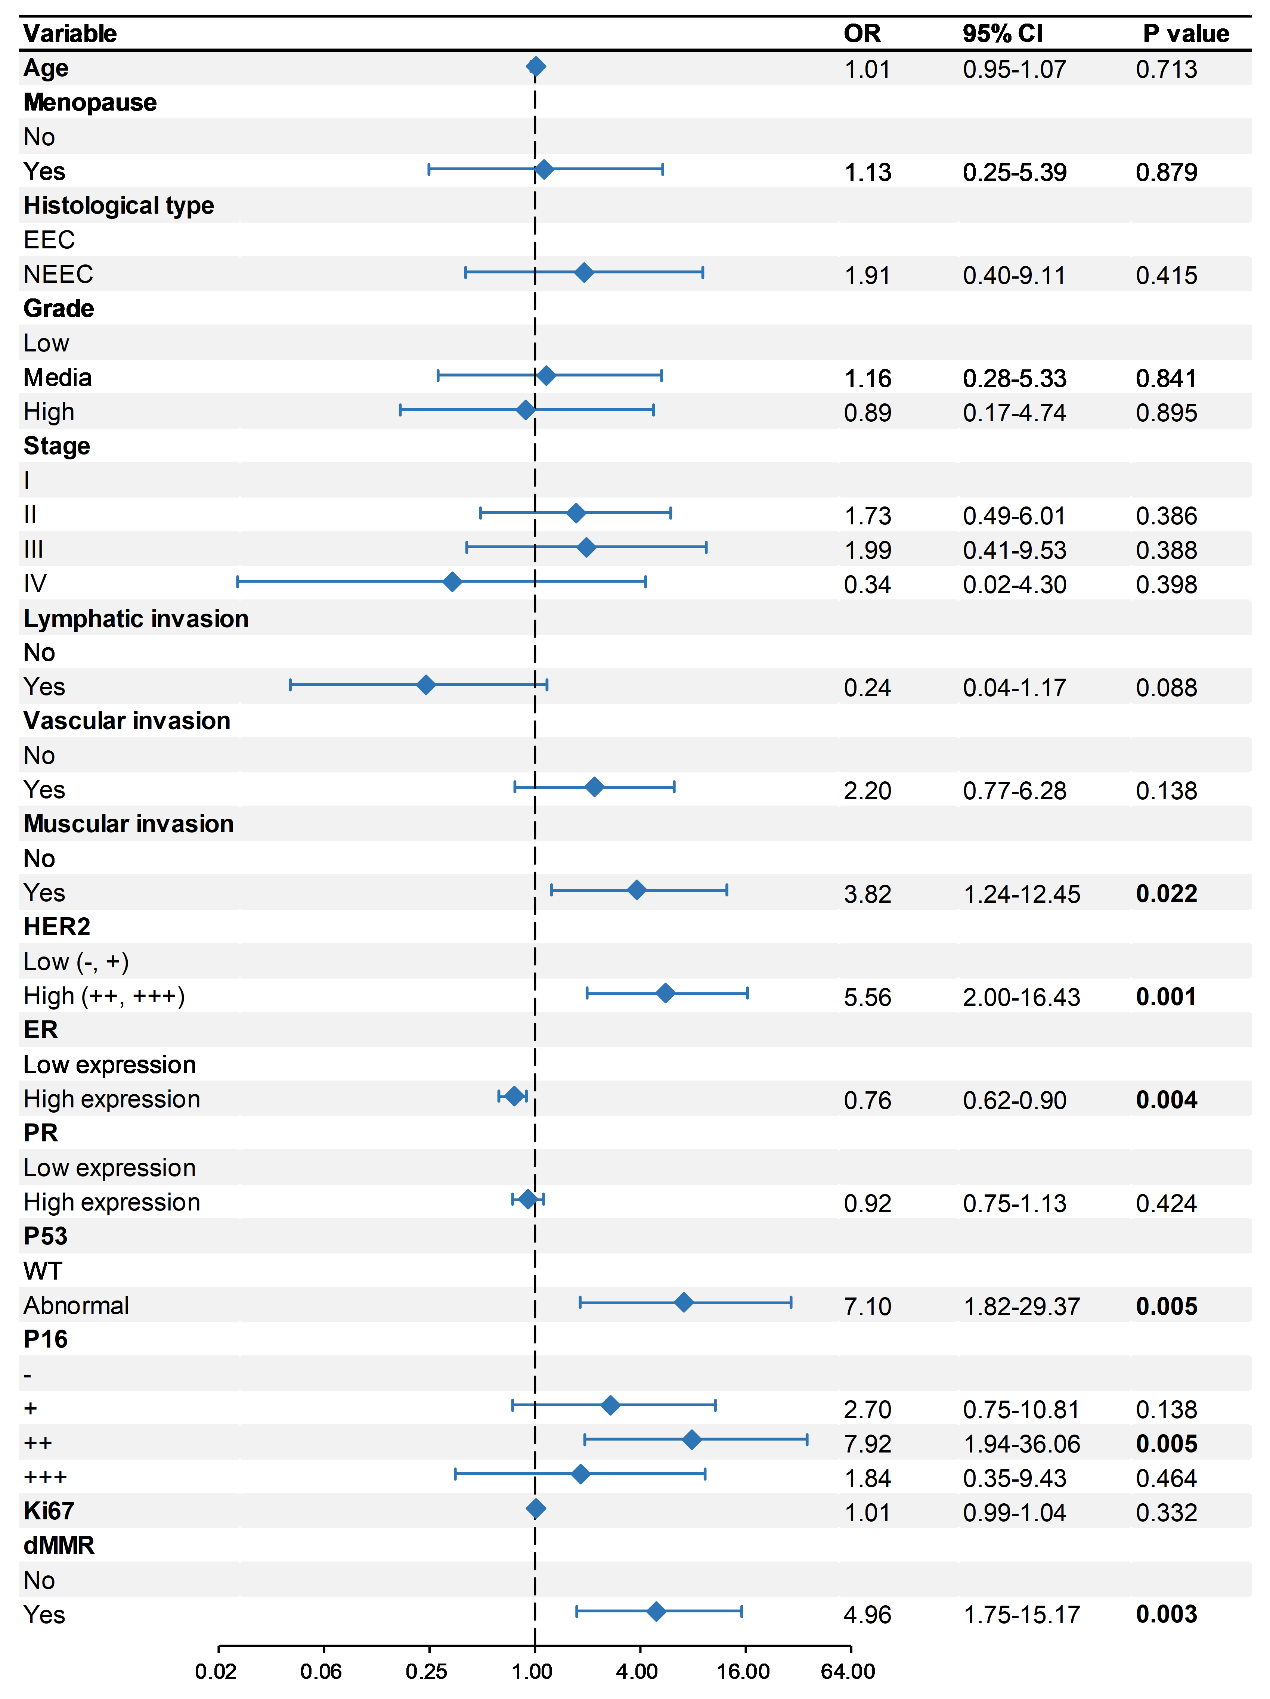


**Supplementary Figure 3.** Forest plot of the multivariate logistic regression analysis. "-", negative; "+", weakly positive; "++", moderately positive; "+++", strongly positive. P values that have statistical significance (＜0.05) were in bold.


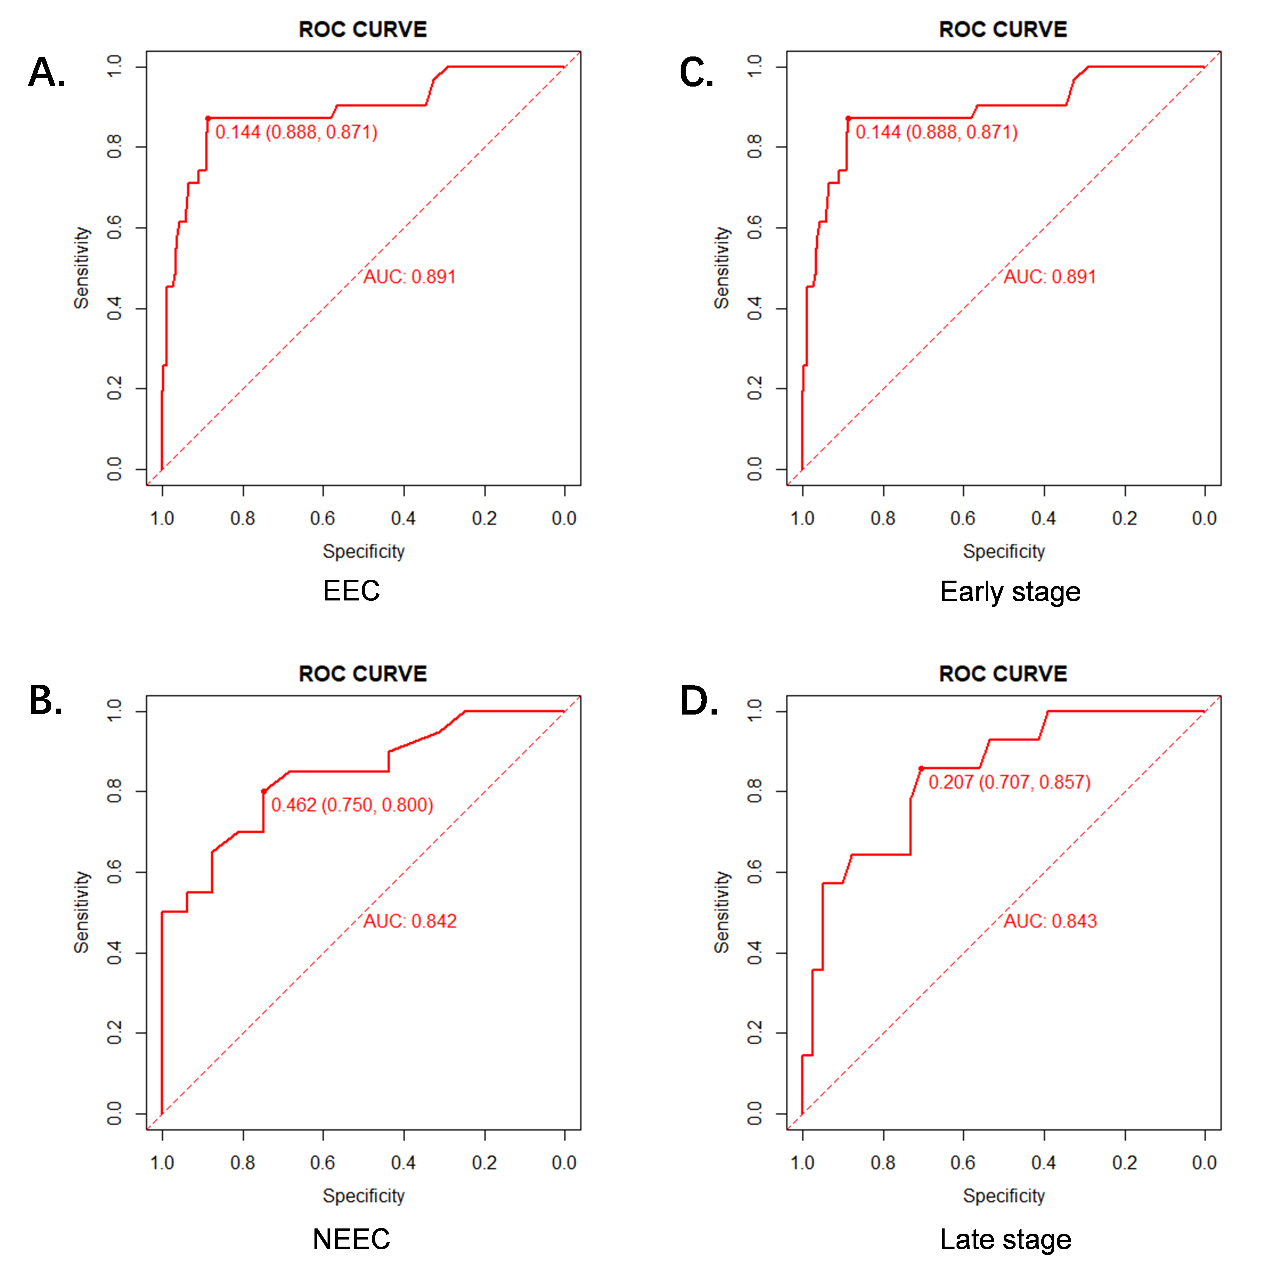


**Supplementary Figure 4.** ROC curves of the nomogram in endometrial cancer subgroups. (A) The ROC curve of the predictive nomogram constructed with the six variables selected in the EEC patients. (B) The ROC curve of the nomogram in the NEEC patients. (C) The ROC curve of the nomogram in the endometrial cancer patients with early stages (stage I-II). (D) The ROC curve of the nomogram in the endometrial cancer patients with advanced stages (stage III-IV). The diagonal line (dashed line) represents the reference line (AUC = 0.5), indicating the result of random guessing with no discrimination ability. EEC, endometrioid endometrial cancer; NEEC, non-endometrioid endometrial cancer.
